# Supplementary material
Source: Springer Nature journal article supplement (https://www.springerprofessional.de/resource/supplementary/13638_2011_201_MOESM5_ESM.pdf/11897270)

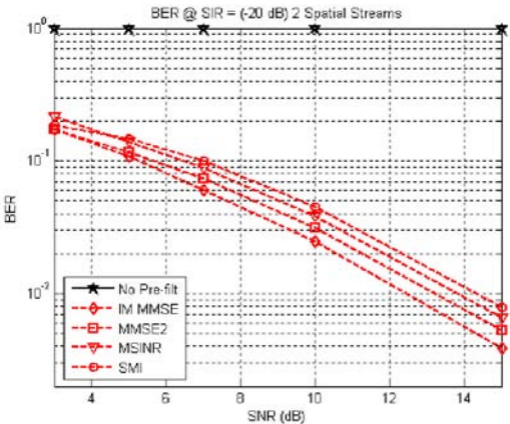

(a) 2 Spatial Streams

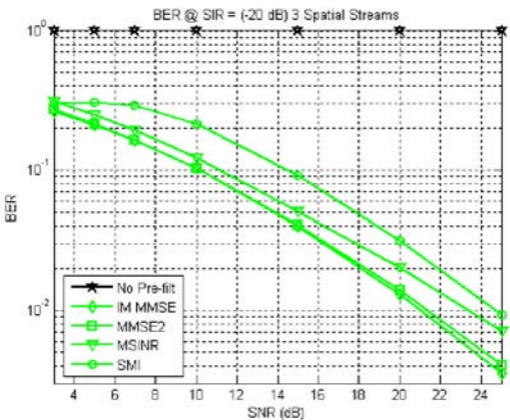

(b) 3 Spatial Streams

Supplement: MOESM5 [file 11897270]
